# Supplementary material for: Facile fabrication of chitin/ZnO composite hydrogels for infected wound healing
Source: Royal Society of Chemistry journal article supplement (doi:10.1039/d2bm00340f), 2022-01-01
Supplement: d2bm00340f1.pdf [file d2bm00340f1.pdf]

1 Supporting Information

2

3

4 **Facile fabrication of chitin/ZnO composite hydrogels for infected wound healing**

5

6 Hongli Zhang<sup>a,1</sup>, Xu Zhang<sup>b,1</sup>, Qi Cao<sup>a</sup>, Shuangquan Wu<sup>c</sup>, Xiao-Qiang Wang<sup>a</sup>, Na Peng<sup>a</sup>, Danlin  
7 Zeng<sup>a</sup>, Jinfeng Liao<sup>b,\*</sup>, Huan Xu<sup>a,\*</sup>

8

9 <sup>a</sup> Key Laboratory of Coal Conversion and New Carbon Materials of Hubei Province School of  
10 Chemistry and Chemical Engineering, Wuhan University of Science and Technology, Wuhan  
11 430081, China

12 <sup>b</sup> State Key Laboratory of Oral Diseases, National Clinical Research Centre for Oral Diseases,  
13 West China Hospital of Stomatology, Sichuan University, Chengdu 610041, China

14 <sup>c</sup> Zhongnan Hospital of Wuhan University, Institute of Hepatobiliary Diseases of Wuhan  
15 University, Transplant Center of Wuhan University, Hubei Key Laboratory of Medical  
16 Technology on Transplantation, Wuhan 430071, China

17

18 <sup>1</sup> These authors contributed equally to this work

19

20

## 1 **Experimental Section**

### 2 **Materials**

3 The raw chitin powder from shrimp shell was purchased from Golden-Shell Biochemical  
4 Co. Ltd. (Zhejiang, China). The raw chitin was purified with 1 M aqueous NaOH at ambient  
5 temperature overnight and combined with 3% (w/w) aqueous H<sub>2</sub>O<sub>2</sub> at 80 °C for 1.5 h. Washing  
6 with deionized water was performed after each step to remove any residual proteins and  
7 chemical reagents. The purified chitin was finally stoving, and kept in a desiccator until use.  
8 ZnO, KOH, urea, and other reagents were of analytical grade and purchased from Shanghai  
9 Chemical Reagent Co. Ltd. (Shanghai, China), and used without further purification. Agar,  
10 yeast extract, and tryptone were purchased from Biofroxx, Germany. Chloral hydrate was  
11 obtained from Beijing bailingwei Technology Co., Ltd. And paraformaldehyde was acquired  
12 from Lanjieke Technology Co., Ltd. SD rats (male, 6-8 weeks old, body weight = 160 -180 g)  
13 were purchased from Chengdu Dashuo Animal Experiment Co. Ltd. The animal investigations  
14 were authorized by the animal committee of Sichuan University.

### 15 **Fabrication of the chitin hydrogels (CG) and chitin/ZnO hydrogels (CZG)**

16 Chitin (5 wt%) was dispersed in aqueous 20 wt% KOH and 4 wt% urea solution with  
17 different ZnO mass fraction of 0 wt%, 0.5 wt%, 1 wt%, and 1.5 wt%. The mixtures were stirred  
18 at -30 °C for about 1 h to obtain the solutions. Then 1.8 g of epichlorohydrin (ECH) was added  
19 to the chitin solutions, and the mixture was stirred at -10 °C for 30 min. The blended chitin/ZnO  
20 solutions were subjected to centrifugation at 1500 rpm for 10min at -10°C to remove the  
21 bubbles. The chitin pre-gel solution was poured into mold and kept at 4 °C for 30 h to form a  
22 “raw” chemical hydrogel. Finally, the “raw” chemical hydrogel was purified by immersion into  
23 20% (w/w) ethanol solution for 3 days to remove the residual alkali and urea. Thus, the chitin  
24 hydrogel and a series of chitin/ZnO composite hydrogels were fabricated, labeled as CG, CZG-  
25 0.5, CZG-1 and CZG-1.5.

### 26 **Characterization**

1 Before measurements, all the samples were freeze-dried in a conventional freezer dryer (Scan  
2 Vac Coolsafe55-4, Denmark), and then were cut into powders. Fourier-transform infrared  
3 spectroscopy was obtained using a FTIR spectrometer (VERTEX70 FTIR Spectrometer,  
4 Bruker, Germany) in the region of 4000–400  $\text{cm}^{-1}$ , the test specimens were prepared by the  
5 KBr-disk method. X-ray diffraction (XRD) in reflection mode was performed on a  
6 diffractometer (ZSX Primus IV, Neo-Confucianism, Japan). The XRD patterns with  $\text{CuK}\alpha$   
7 radiation ( $\lambda = 0.15406 \text{ nm}$ ) at 40 kV and 30 mA were recorded in the region of  $2\theta$  from  $5^\circ$  to  
8  $80^\circ$  at a scanning speed of  $3^\circ/\text{min}$ . X-ray photoelectron spectra (XPS) were recorded using the  
9 machine (AXIS SUPRA+, Kratos, Japan). The binding energy was corrected to 284.6 eV for C  
10 1s. Thermogravimetric analysis (TGA) was carried out using a TA Q500 instrument (TA  
11 Instruments, USA), the sample was placed in a platinum pan and heated from  $80^\circ\text{C}$  to  $800^\circ\text{C}$   
12 at a rate of  $10^\circ\text{C}/\text{min}$  under an air atmosphere. The compressive strength and cyclic  
13 compressive properties of the wet hydrogels were determined on a universal testing machine  
14 (Model 6503 UTM Instrument, China) equipped with a 500 N load cell. The compressive test  
15 was performed using a crosshead speed of 5 mm/min, and the modulus was calculated from the  
16 initial linear region of the stress–strain curves. Cyclic compressive tests were performed at a  
17 compressive strain of 60% for five cycles. Scanning electron micrograph (SEM) images of  
18 hydrogels were obtained on a BAOER microscope (Q Series, USA) using the back scattered  
19 electron imaging (BSE) mode and an accelerating voltage at 5 kV. The wet hydrogels were  
20 frozen in liquid nitrogen, immediately snapped, and freeze-dried, then the surface and cross-  
21 section of the samples were sputtered with gold for SEM measurements.

22 The water content of the samples was tested by the gravimetric method. After weighted ( $W_b$ ),  
23 the wet hydrogels were freeze-dried and weighted as  $W_a$ . Each sample was tested three times.  
24 The water content was determined using the following equation:

25 
$$\text{Water content (\%)} = (W_b - W_a) / W_b \times 100$$

26 **Antibacterial property of the CG and CZG samples**

1 The antibacterial activity of the CG and CZG, against the Gram-positive bacterium  
2 *Staphylococcus aureus* (*S. aureus*) and Gram-negative bacterium *Escherichia coli* (*E. coli*), was  
3 examined using the disc diffusion method, colony-forming count method, antibacterial kinetic  
4 curve and SEM observation for qualitative and quantitative analyses, respectively.

5 For disc diffusion method, single colonies of *S. aureus* and *E. coli* were cultured separately  
6 in 20 mL LB liquid culture medium in an incubator at 37 °C. The log-phase bacteria were  
7 diluted 3 times with PBS, followed by uniformly spreading 100 µL of the bacterial suspension  
8 on an agar plate. Wafer type CG/CZG (circular disks 16 mm in diameter) was placed on the  
9 agar plates and cultured at 37 °C for 16 h, then the inhibition zone of the hydrogels was  
10 recorded.

11 For colony-forming count method, after *S. aureus* or *E. coli* were cultured on LB agar  
12 plates at 37 °C for 24 h, a single colony was selected, inoculated into LB broth, and incubated  
13 at 37 °C under shaking at 250 rpm overnight to reach the mid-log phase. Then, *S. aureus* and  
14 *E. coli* were diluted to  $1.0 \times 10^5$  and  $1.0 \times 10^4$  CFU/mL in fresh broth, respectively. After a  
15 cylindrical hydrogel with a diameter of 16 mm and a height of 2 mm was added to a 24-well  
16 plate, 180 µL of sterile water and 20 µL of *S. aureus* or *E. coli* suspension were added, and the  
17 mixture was incubated at 37 °C under shaking at 150 rpm for 14 h. Next, 100 µL of the mixture  
18 was diluted 7 times, then 100 µL of the diluent mixture was spread onto solid agar plates. The  
19 plates were incubated at 37 °C for 24 h, and the number of viable cells was counted. *S. aureus*  
20 or *E. coli* suspensions with CG hydrogels were used as control.

21 For SEM observation, *E. coli* and *S. aureus* were treated with CG/CZG at 37 °C for 24 h,  
22 untreated and treated bacteria were centrifuged at 8000 rpm for 1 min, washed three times with  
23 phosphate-buffered saline (PBS) and fixed with 2.5% glutaraldehyde for 5 h, dehydrated with  
24 a graded alcohol series (10, 20, 30, 50, 70, 60, 90, and 100%), and then freeze-dried.  
25 Lyophilized powders were sputtered with gold for SEM measurements.

26 **Biocompatibility test**

1 Cytocompatibility studies were assessed using CCK-8 assay and carried out using embryonic  
2 mouse fibroblast cell line (NIH-3T3 cells). The cytotoxicity test started with liquid extracts of  
3 hydrogels. Each hydrogel with diameter of 12 mm and height of 1 mm was immersed in 1 mL  
4 cell growth media at 37 °C for 72 h, the cell growth media (negative) were treated with the  
5 same condition. 200 µL NIH-3T3 was seeded in 96-well plates with  $4 \times 10^3$  cells per well and  
6 cultured to adhere at 37 °C for 24 h in 5% CO<sub>2</sub> atmosphere in Dulbecco's modified Eagle's  
7 medium (DMEM) supplemented with 10% fetal bovine serum (FBS) and 1%  
8 streptomycin/penicillin. 60 µL culture media was replaced with 60 µL treated cell growth media  
9 (negative) or 60 µL liquid extracts of hydrogels (experiment) labelled as 30% (v/v) extract  
10 containing complete growth media. Next, they were incubated for an additional 24 and 72 h to  
11 expose the cells to the extract. To evaluate the viability, the media was replaced by 200 µL of  
12 10% (Cell Counting Kit-8, Dojindo Laboratories, Japan) (CCK-8) solution and further  
13 incubated for 4 h at 37 °C. 150 µL supernatant liquid incubated media were transferred to fresh  
14 96-well plates for colorimetric assessment using a microplate reader at 450 nm.  
15 Cytocompatibility study of CZG-1 to human umbilical vein endothelial cells (HUVEC) for 24  
16 h was conducted as the above procedure. Cell viability was calculated using the following  
17 formula:

$$18 \quad \text{Cell viability (\%)} = (A_{\text{test}} - A_0) / (A_{\text{control}} - A_0) \times 100$$

19 Where the  $A_{\text{test}}$  and the  $A_{\text{control}}$  were the absorbance of the experimental groups and the control  
20 group,  $A_0$  was the absorbance of CCK-8 in culture medium without cells. The data of  
21 sextuplicate samples are expressed as mean  $\pm$  the standard deviation.

22 Additionally, the cell biocompatibility was evaluated by the Calcein-AM/ PI staining. At  
23 first, 1 mL fresh NIH-3T3 cells suspension with  $2.5 \times 10^4$  cells/mL were seeded in 24-well  
24 plates, then 300 µL of the liquid extracts treated with sterilized hydrogels were placed in the  
25 24-well plates and cultured with NIH-3T3 cells at 37 °C for 24 and 72 h, with the culture  
26 medium itself without samples as a control. After washing by PBS, 200 µL Calcein-AM

1 (green)/ PI (red) solution was added and followed by incubation at 37 °C for 20 min. Then they  
2 were washed with PBS to remove unstained fluorescence dye and immediately observed by a  
3 fluorescence microscope at the corresponding excitation wavelength ( $490 \pm 10$  nm).

4 For hemolysis assay, CG, CZG-0.5, CZG-1, and CZG-1.5 with diameter of 12 mm and height  
5 of 1 mm were incubated with red blood cells (RBCs) from rabbits and the hemolysis ratio was  
6 calculated. The prewashed (5% v/v in PBS) RBCs (0.1 mL) was incubated with CG, CZG-0.5,  
7 CZG-1, and CZG-1.5 at 37 °C for 4 h. Then 150  $\mu$ L of the supernatant was transferred to a 96-  
8 well plate, and the absorbance was measured at 545 nm. PBS was used as negative control  
9 group and 0.1% Triton x-100 as positive control, respectively. The hemolysis ratio was  
10 calculated as follows:

$$11 \quad \text{Hemolysis ratio (\%)} = (A_{\text{test}} - A_0) / (A_{100} - A_0) \times 100$$

12 Where  $A_{\text{test}}$ ,  $A_0$  and  $A_{100}$  represent the absorbance of the experimental groups, negative and  
13 positive controls, respectively.

#### 14 **Evaluation of CZG-1 hydrogels in infected wound healing**

15 All animal procedural methods in this experiment were in accordance with the protocols and  
16 regulations of Sichuan University. Surgical operation was applied in the left and right backsides  
17 of rats to build a 10 mm  $\times$  10 mm round wound. *S. aureus* suspension (50  $\mu$ L) with  $3 \times 10^8$   
18 CFU/mL was added to each wound area. After 24 h of bacteria inoculation, the rats were  
19 randomly divided into the following four groups: control group, mupirocin-treated group, CG  
20 hydrogels-treated group, and CZG-1 hydrogels-treated group.

21 To demonstrate the ability of CZG-1 in antibacterial therapy *in vivo*, the wounds were treated  
22 with CZG-1 hydrogels for 3 days. At this time point, the wound skin was thoroughly disinfected  
23 with iodophor, and the full-thickness skin was completely removed and immersed in PBS for 4  
24 h. Subsequently, the surface of samples was washed to obtained bacterial suspensions. Bacterial  
25 suspensions were spread on LB agar plates after gradient dilution. After incubation for 24 h at  
26 37 °C, the number of bacteria in each group was counted. On the 3rd, 7th, and 14th day of

1 accepting antibacterial therapy and wound healing, a digital camera was employed to record  
2 the wound images and further calculate the wound closure rate. Image J was employed to  
3 measure the wound closure rate after magnification four times to obtain precise wound margins.  
4 The irregular pattern drawing of the wound was followed by measurements. During calibration  
5 and drawing, the images were enlarged x4 to obtain accurate edges. The relative wound closure  
6 rate was deduced from the drawing area.

7 For histological evaluation, on the 7th and 14th day, rats were sacrificed to collect full-  
8 thickness skin samples ( $n = 3$ ). These samples were paraffin-embedded and sectioned after  
9 fixation in paraformaldehyde for 3 days. Besides, hematoxylin and eosin (H&E) and Masson  
10 staining were performed to histologically evaluate wound healing. And the average thickness  
11 of neo-epithelium and neo-granulation tissue was semi-quantitatively analyzed using the  
12 software Image pro plus.

13  
14  
15  
16  
17

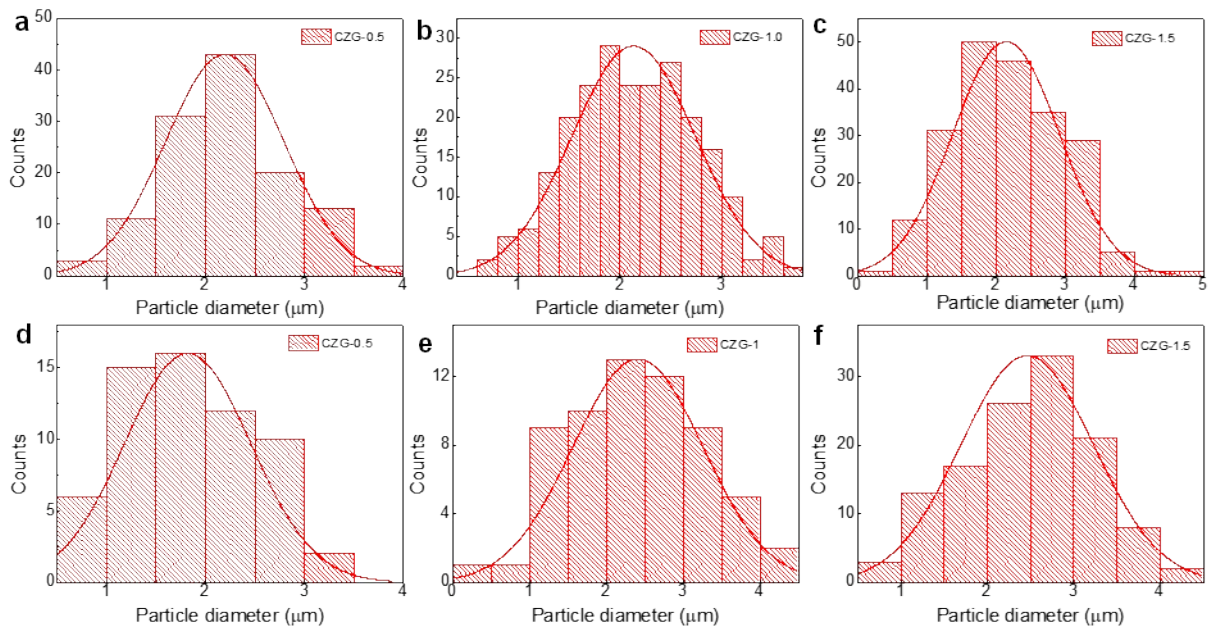

1

2 **Fig. S1** Size distribution of the ZnO particles on the surface (a-c) and cross-section (d-f) of  
 3 CZG-0.5 (a, d), CZG-1 (b, e), and CZG-1.5 (c, f)

4

5

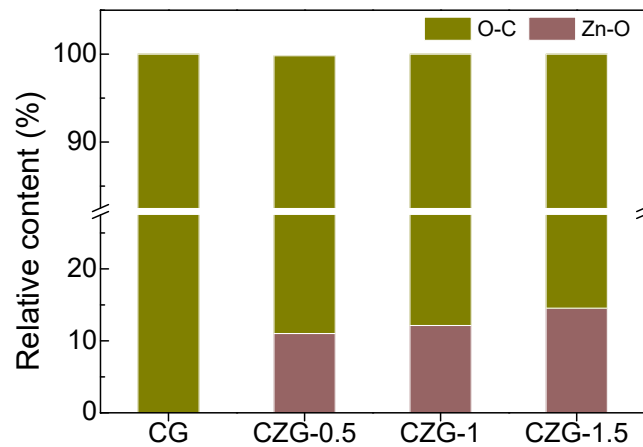

6

7 **Fig. S2** Relative Zn-O content in CG, CZG-0.5, CZG-1, and CZG-1.5 calculated according to  
 8 high-resolution XPS spectra of O 1s.

9

10

11

12



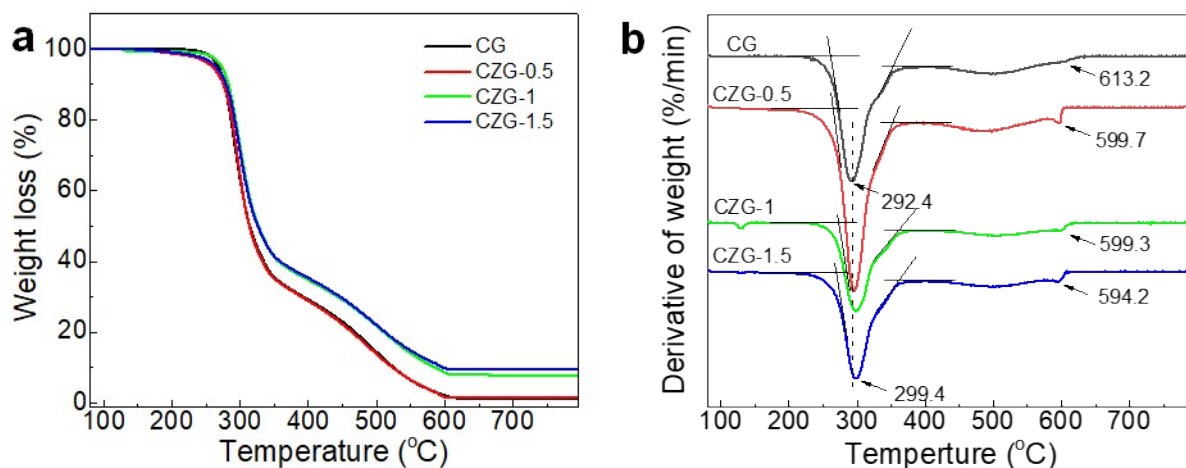

1

2 **Fig. S3** Thermal properties. TGA (a) and DTG curves (b) of CG, CZG-0.5, CZG-1, and CZG-

3 1.5

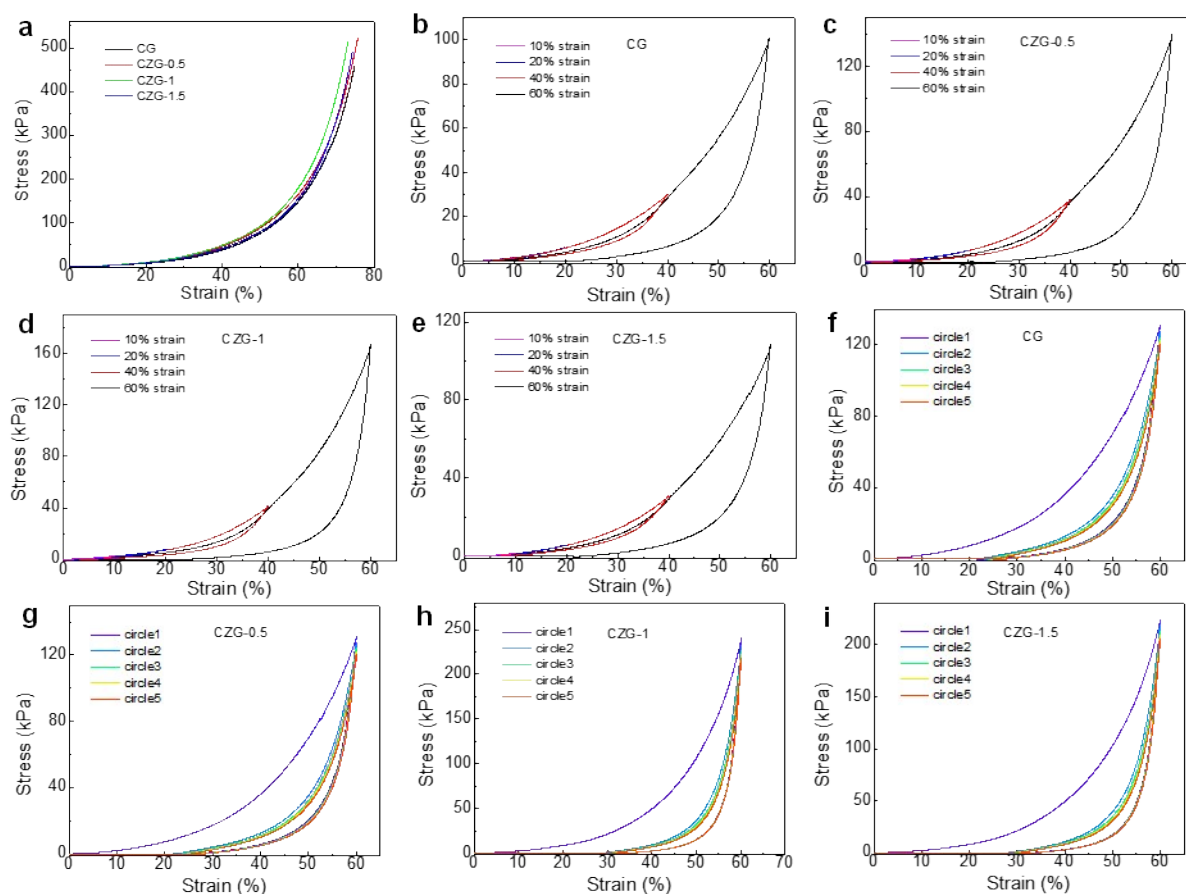

4

5 **Fig. S4** Mechanical properties. (a) The compressive stress–strain curves of the CG, CZG-0.5,

6 CZG-1, and CZG-1.5 hydrogels. (b-e) Compressive stress-strain curves of the CG (b), CZG-

7 0.5 (c), CZG-1 (d), and CZG-1.5 hydrogels (e) at strains from 10% to 60%. (f-i) Fatigue

8 resistance of the CG (f), CZG-0.5 (g), CZG-1 (h), and CZG-1.5 hydrogels (i) at 60% strain.

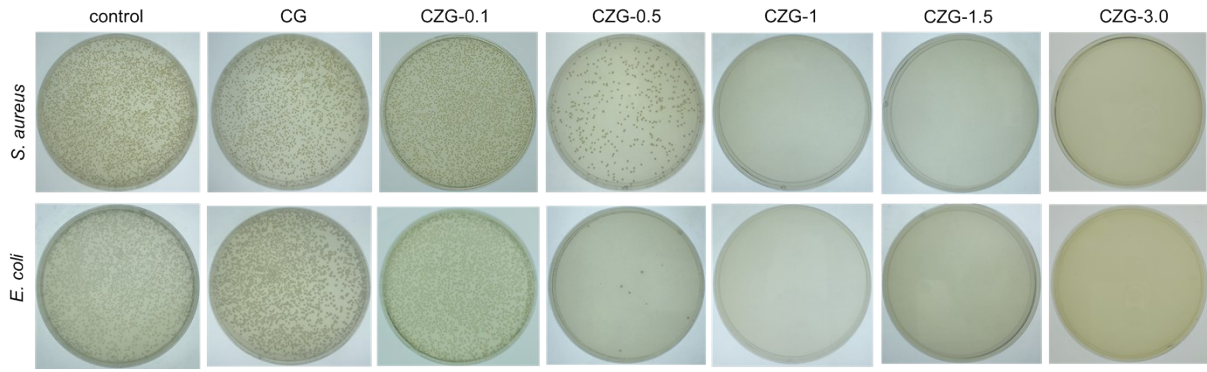

2 **Fig. S5** The images of *S. aureus* and *E. coli* colonies on the agar plates.

3

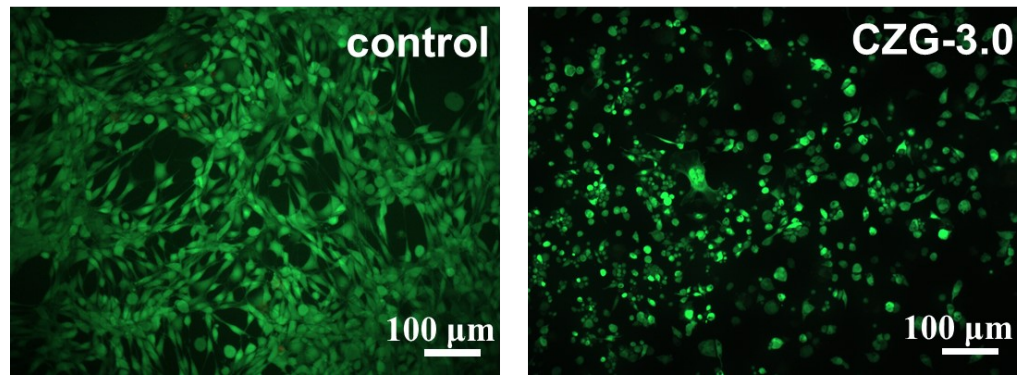

5 **Fig. S6** Live/dead cell viability assay of NIH-3T3 cells in the control (cell growth media) and  
 6 CZG-3.0 hydrogel extracting medium for 72 h.

7

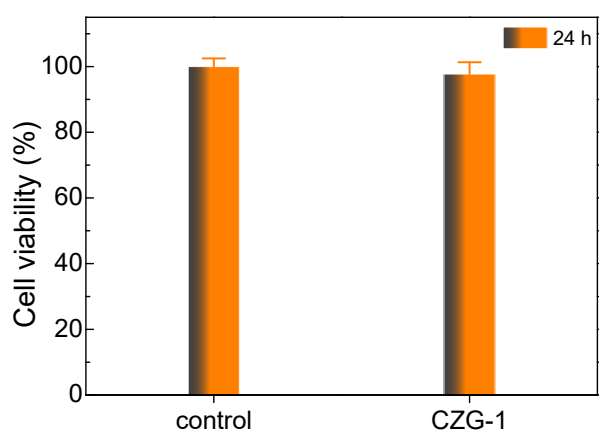

8  
 9 **Fig. S7** Cell viability of HUVEC cells after co-incubated with CZG-1 hydrogel extracting  
 10 mediums for 24 h.
